# Urologia Internationalis

Founded by PETER A. NARATH (1955–†1962) and HEINRICH HEUSSER (1955–†1967)

Editor  
Editorial Board

|                                      |                                       |                                       |
|--------------------------------------|---------------------------------------|---------------------------------------|
| G. MAYOR, Zürich                     | P. DEUTICKE, Wien                     | F. MAY, München                       |
| C. E. ALKEN, Homburg,<br>Saar        | J. D. FERGUSON, London                | E. MICHALOWSKI, Kraków                |
| J. J. ALVAREZ IERENA,<br>Mexico City | R. DE FREITAS, São Paulo              | J. MOMBAERTS, Bruxelles               |
| R. ANDERSEN, Oslo                    | G. GIERTZ, Stockholm                  | H. MORTENSEN, Melbourne               |
| J. AUVERT, Paris                     | S. GIL VERNET, Barcelona              | A. OBERHOLTZER, Rome                  |
| A. BABICS, Budapest                  | H. U. GLOOR, Zürich                   | O. OBRANT, Hälsingborg                |
| P. BISCHOFF, Hamburg                 | W. E. GOODWIN,<br>Los Angeles, Calif. | V. PAČES, Prague                      |
| J. BISQUERTT, Santiago               | W. GRÉGOIR, Bruxelles                 | E. PÉREZ-CASTRO, Madrid               |
| H. BOEMINGHAUS,<br>Düsseldorf        | I. H. GRIFFITHS, Northwood            | S. PETKOVIĆ, Belgrade                 |
| E. BORS, Cave Creek, Ariz.           | H. G. HANLEY, London                  | A. PUIGVERT, Barcelona                |
| K. BOSHAMER,<br>Bad Dürkheim         | F. HINMAN, San Francisco,<br>Calif.   | L. N. PYRAH, Leeds                    |
| P. BRUNI, Napoli                     | F. A. HUGHES, Montevideo              | A. PYTEL, Moscow                      |
| TH. BURGHELE, Bucharest              | A. R. KÜSS, Paris                     | G. RAVASINI, Padova                   |
| M. CAINE, Jerusalem                  | T. KUSUNOKI, Osaka                    | D. R. SMITH, San Francisco,<br>Calif. |
| A. CARNEIRO DE MOURA,<br>Lisbon      | J. LANGE, Bordeaux                    | H. TAKAYASU, Hongo                    |
| J. C. CHRISTOFFERSEN,<br>Copenhagen  | W. F. LEADBETTER, Boston,<br>Mass.    | F. TSUCHIYA, Tokio                    |
| L. CIFUENTES-DELATTE,<br>Madrid      | E. LJUNGGREN, Göteborg                | R. D. TURNER, Los Angeles,<br>Calif.  |
| P. J. DENNEHY, Johannes-<br>burg     | L. LOPEZ, Caracas                     | R. UEBELHÖR, Wien                     |
|                                      | S. A. MACDONALD,<br>Montreal          | A. VILLANUEVA, Mexico City            |
|                                      | H. MARBERGER, Innsbruck               | W. F. WHITMORE<br>New York, N. Y.     |
|                                      | R. I. MATHIS, Buenos Aires            | E. WILDBOLZ, Bern                     |
|                                      |                                       | D. I. WILLIAMS, London                |

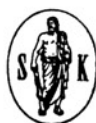

S. Karger · Basel · München · Paris · London · New York · Sydney  
Arnold-Böcklin-Strasse 25, CH-4011 Basel (Switzerland)

---

All rights, including that of translation into other languages, reserved.  
Photomechanic reproduction (photocopy, microcopy) of this volume or parts thereof  
without special permission of the publishers is prohibited.

© Copyright 1975 by S. Karger AG, Verlag für Medizin und Naturwissenschaften, Basel  
Printed in Switzerland by Buchdruckerei National-Zeitung AG, Basel

# Index

## *3rd Annual Meeting of the International Continence Society* Copenhagen, September 1, 1973

|                                                                                                                                                                                                   |     |
|---------------------------------------------------------------------------------------------------------------------------------------------------------------------------------------------------|-----|
| AGERHOLM, M.: Classification of Incontinence .....                                                                                                                                                | 3   |
| CLOW, W. M.: Effect of Posture on Bladder and Urethral Function in Normal Pregnancy. A Preliminary Report .....                                                                                   | 9   |
| COOLSAET, B. L. R. A.; DUYL, W. A. VAN; MASTRIGHT, R. VAN, and ZWART, A. VAN DER: Visco-Elastic Properties of the Bladder Wall .....                                                              | 16  |
| GLEN, E.S.; JAMES, W., and ROWAN, D.: Fate of Irrigating Fluid during Urethral Pressure Profile Measurement .....                                                                                 | 27  |
| GRIFFITHS, D. J.: Urethral Resistance to Flow: the Urethral Resistance Relation. Abbreviated Report .....                                                                                         | 28  |
| HAUBENSAK, K.; SCHINDLER, E., and ROTHAAAR, J.: Dependence of Resting Urethral Pressure on Age and Sex of Healthy Subjects and on Technical Details .....                                         | 29  |
| STOCKAMP, K. and SCHREITER, F.: $\alpha$ -Adrenolytic Treatment of the Congenital Neuropathic Bladder .....                                                                                       | 33  |
| PALM, L.: Urodynamic Evaluation of Female Incontinence .....                                                                                                                                      | 34  |
| OLESEN, K. P.: Bladder Base Insufficiency .....                                                                                                                                                   | 46  |
| MELCHIOR, H.: Tubular Cystourethronostomy after Total Prostatectomy .....                                                                                                                         | 54  |
| KIESSWETTER, H. and SCHÖBER, W.: Lioresal in the Treatment of Neurogenic Bladder Dysfunction .....                                                                                                | 63  |
| OTT, R. and ROSSIER, A. B.: Urinary Manometry in Spinal Cord Injury Patients. External Urethral Sphincter Pressure Recordings before and after Sphincterotomy .....                               | 72  |
| MADERSBACHER, H. and SCOTT, F. B.: Twelve O'Clock Sphincterotomy: Technique, Indications, Results (Abbreviated Report) .....                                                                      | 75  |
| PALMTAG, H.; BOETTGER, F.; STAHL, J., and RÖHL, L.: Simultaneous Cine-Urography and Manoflowmetric Evaluation of the Neurogenic Component in Incontinence .....                                   | 77  |
| TORRENS, M. J.: Urodynamic Analysis of Differential Sacral Nerve Blocks and Sacral Neurectomy .....                                                                                               | 85  |
| VEREECKEN, R. L.; DERLUYN, J., and VERDUYN, H.: Electromyography of the Perineal Striated Muscles during Cystometry .....                                                                         | 92  |
| TRONTELJ, J. V.; GODEC, C.; JANKO, M., and RAKOVEC, S.: Mechanisms of Urinary Incontinence in Peripheral Neurogenic Lesions .....                                                                 | 99  |
| JELASIC, F.; FISCHER, D., and ALLERT, M. L.: Diagnosis of Neurologic Disorders of Micturition without Evidence of the Pathological Process by Measuring Conduction Velocity of Sacral Roots ..... | 100 |
| FLACK, F. C. and JAMES, E. D.: Case Study Using Simultaneous Bladder Pressure and Urine Loss Measurements .....                                                                                   | 103 |

*Original Papers*

|                                                                                                                                                                                                   |     |
|---------------------------------------------------------------------------------------------------------------------------------------------------------------------------------------------------|-----|
| REISEWITZ, H. und RUEDAS, G.: Nierenfunktion während des totalen Blutersatzes bei der Ratte .....                                                                                                 | 109 |
| REISEWITZ, H. und RUEDAS, G.: Electrolyt- und Wasserverschiebungen an hypotherm mit Plasma perfundierten Hundenieren .....                                                                        | 117 |
| MOORMANN, J. G.: Angeborene bulbäre Harnröhrenenge. Pathogenese und Klinik der Erkrankungen des Blasenhalsses und des urogenitalen Grenzgebietes (Mit 2 Farbtafeln) .....                         | 129 |
| PETRITSCH, P. H.; SACKS, S. A. und KAUFMAN, J. J.: Extrakorporale Nierenchirurgie unter Anwendung einer neuen Konservierungsmethode .....                                                         | 145 |
| SCHÖNFELD, J.; SCHREIBMAN, S., and PICK, A. I.: $\alpha$ -Fetoprotein in a Patient with Embryonal Cell Carcinoma of the Testes .....                                                              | 162 |
| VIDNE, B.; ERDMAN, S.; GASSNER, S., and LEVY, M. J.: Ureteral Substitute by Fallopian Tube. Experimental Study .....                                                                              | 173 |
| HAAS, P. und TERBIZAN, A.: Spätfolgen bei neurogenen Blasenentleerungsstörungen nach Querschnittläsionen .....                                                                                    | 181 |
| KATONA, F.: Stages of Vegetative Afferentation in Reorganization of Bladder Control during Intravesical Electrotherapy .....                                                                      | 192 |
| TSUCHIDA, S.: Double-Layer Needle Cannula for Percutaneous Artery or Vein Catheterization in Patients Requiring Hemodialysis .....                                                                | 204 |
| SHISHITO, S.; SHIRAI, M., and MATSUDA, S.: Treatment of Organic Impotence by Implantation of Silicone Penile Prosthesis .....                                                                     | 211 |
| KIMURA, Y.; MIYATA, K.; ADACHI, K., and KISAKI, N.: Peripheral Nerves Controlling the Closure of Internal Urethral Orifice during Ejaculation .....                                               | 218 |
| TAKASAKI, E.: An Observation on the Composition and Recurrence of Urinary Calculi .....                                                                                                           | 228 |
| PFITZENMAIER, N. W.; WURSTER, K., and KJELLE-SCHWEIGLER, M.: Hemangioma of the Tunica albuginea testis .....                                                                                      | 237 |
| ROST, A.; RIEDEL, B., und PUST, R.: Die zytologische Kontrolle der Effizienz der antiandrogenen Therapie des Prostatakarzinoms .....                                                              | 245 |
| FINGERHUT, B. und VEENEMA, R. J.: Observations on Possible Autoimmune Therapeutic Effects in Experimentally Produced Rat Bladder Tumors .....                                                     | 255 |
| MATOUSCHEK, E. und MICHEALIS, W. E.: Über die transurethrale Schlitzung von Harnröhrenstrikturen unter endoskopischer Kontrolle .....                                                             | 266 |
| SULMONI, A.; LEISINGER, H. J.; HAURI, D. und SCHMUCKI, O.: Blasenersatz durch ein kontinentes Ileumreservoir. Tierexperimentelle Studie an Hunden .....                                           | 273 |
| PUIGVERT, A.: Caliceal Urodynamics .....                                                                                                                                                          | 282 |
| SHABAD, A. L.: New Features in the Pathogenesis of Renal Tuberculosis and Their Significance for its Detection .....                                                                              | 297 |
| PUIGVERT, A.; JIMÉNEZ, F. et MANAVELLA, J. N.: Implantation périnéale néoplasique après la biopsie de la prostate .....                                                                           | 305 |
| REVÚSOVÁ, V.; ZVARA, V.; GRATZLOVÁ, J.; ŘEZNÍČEK, J., and PAVLOVIČ, M.: Mag-nesium Deficit after Renal Transplantation with Secondary Posttransplantation Hypocalcemia and Hypophosphatemia ..... | 313 |

|                                                                                                                                                                                                                           |                    |
|---------------------------------------------------------------------------------------------------------------------------------------------------------------------------------------------------------------------------|--------------------|
| LOPATKINE, N. A.; SHABAD, A. L.; RODOMANE, V. E. et BESHLY-OGLY, D. A.: La portée du test à la tuberculine dans le dépistage de la tuberculose du rein . . . .                                                            | 321                |
| DELL'ADAMI, G. and BRUNETTI, A.: Haematuria following Radiotherapy for Bladder Tumours. An Approach to Therapy . . . . .                                                                                                  | 326                |
| SCHMIDT, G. P. und LOEWENECK, H.: Über die Häufigkeit der linken retroaortären Nierenvene bei Erwachsenen . . . . .                                                                                                       | 332                |
| KIMURA, Y.; ADACHI, K.; KISAKI, N., and ISE, K.: Role of $\alpha$ -Adrenergic Receptor Mechanism in Closure of the Internal Urethral Orifice during Ejaculation . . . .                                                   | 341                |
| FLADERER, H. und HUBMER, G.: Zur Frage des histologischen Aufbaus des pelviureteralen Segmentes bei kongenitaler Harnstauungsniere . . . . .                                                                              | 350                |
| MOSCONI, C. E. V.; IANHEZ, L. E.; BORRELLI, M.; SABBAGA, E., and FREIRE, J. G. C.: Vesicoureteral Reflux in Patients in End-Stage Chronic Renal Failure . . . . .                                                         | 357                |
| ZINSMEYER, J.; HORPÁCSY, G.; ALTHAUS, P.; STROBELT, V., and MAY, G.: Die Aussagefähigkeit der LDH-Bestimmung im Perfusat als Vitalitätskriterium bei Nierentransplantation . . . . .                                      | 362                |
| CONSTANTINOU, C. E.: Statistical Properties of the Temporal and Spatial Distribution of Interperistaltic Intervals and their Relationship to Pacemaker and Respiratory Rhythmicity . . . . .                              | 369                |
| KOMATZ, Y. and YOSHIDA, O.: Simplified Method for Transvaginal Closure of Vesicovaginal Fistula after Hysterectomy . . . . .                                                                                              | 381                |
| ASO, Y. and KINOSHITA, K.: Postoperative Improvement of Hypertension in Primary Aldosteronism and Cushing's Syndrome . . . . .                                                                                            | 386                |
| MOBILIO, G. and COSCIANI CUNICO, S.: Ureteropyelostomy with Flaps with an Everted Suture . . . . .                                                                                                                        | 397                |
| ROST, A.; KELÂMI, A.; WEBER, P.; PUST, R., and TAENZER, V.: Metastasennachweis durch Lymphographie beim Prostatakarzinom . . . . .                                                                                        | 402                |
| MÖHRING, K.; PFITZENMAIER, N., and PANIS-HOFFMANN, C.: Cryosurgery of the Prostate and Transurethral Resection in Poor Surgical Risk Patients. A Comparative Clinical Follow-Up Study . . . . .                           | 414                |
| FROHMÜLLER, H. und ACKERMANN, R.: Zur Diagnostik und Therapie des Sarcoma botryoides. Bericht eines Falles mit mehr als 7jähriger Überlebenszeit und Literaturübersicht . . . . .                                         | 420                |
| KIM, C.-H. and FJELDBORG, O. C.: Lymphocele Formation after Renal Transplantation . . . . .                                                                                                                               | 433                |
| ISHIBE, T.; MORI, K.; USUI, T.; NIHIRA, H., and YASUSHI, K.: Alterations of Serum Lactic Dehydrogenase and its Isoenzyme V Fraction Levels following Hyperglycemic Condition in Patients with Bladder Carcinoma . . . . . | 437                |
| HIDAI, H.: Characteristics of Renovascular Hypertension in Japan . . . . .                                                                                                                                                | 446                |
| HARZMANN, R. und CHIARI, R.: Zur Ätiologie und Therapie des rezidivierenden Harnwegsinfektes und der Enuresis von Mädchen . . . . .                                                                                       | 455                |
| HODGKINSON, A.; BISSETT, P., and TYE, J.: Effect of Succinimide and other Drugs on Oxalate Excretion by Rats . . . . .                                                                                                    | 465                |
| Book Reviews · Buchbesprechungen · Livres nouveaux . . . . .                                                                                                                                                              | 172, 242, 396, 472 |
| Varia . . . . .                                                                                                                                                                                                           | 473                |
| Author Index . . . . .                                                                                                                                                                                                    | 474                |
| Subject Index . . . . .                                                                                                                                                                                                   | 476                |

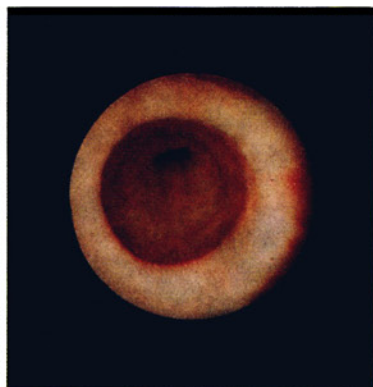

A

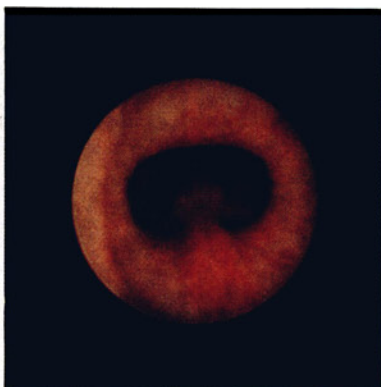

B

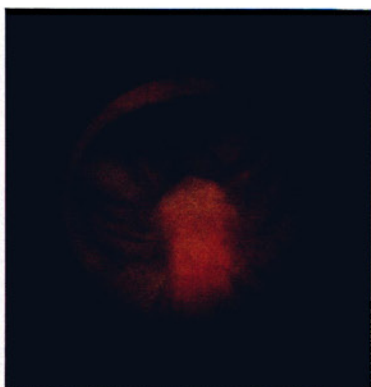

C

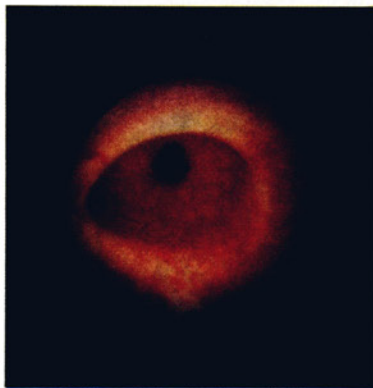

D

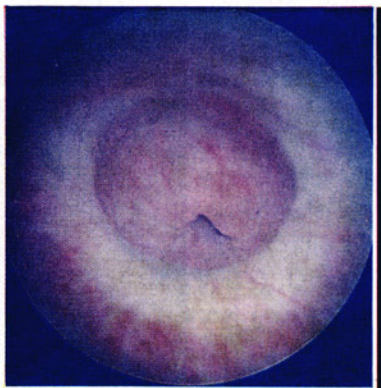

E

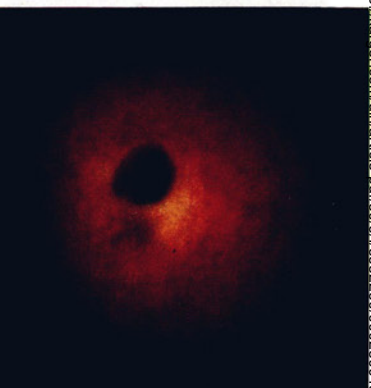

F

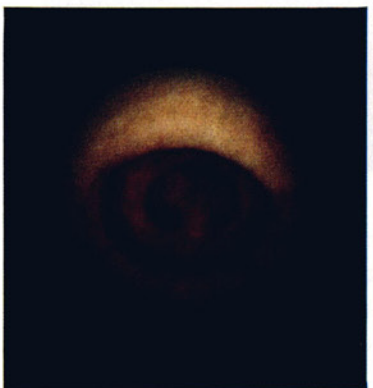

G

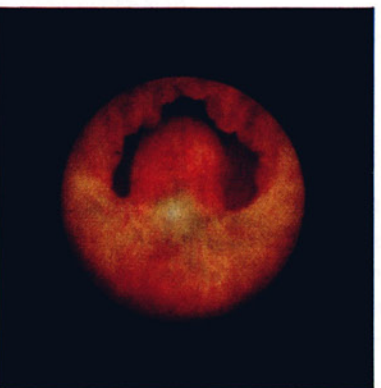

H

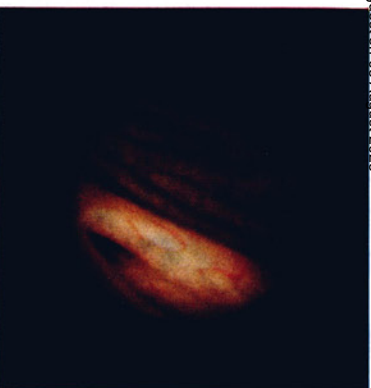

I

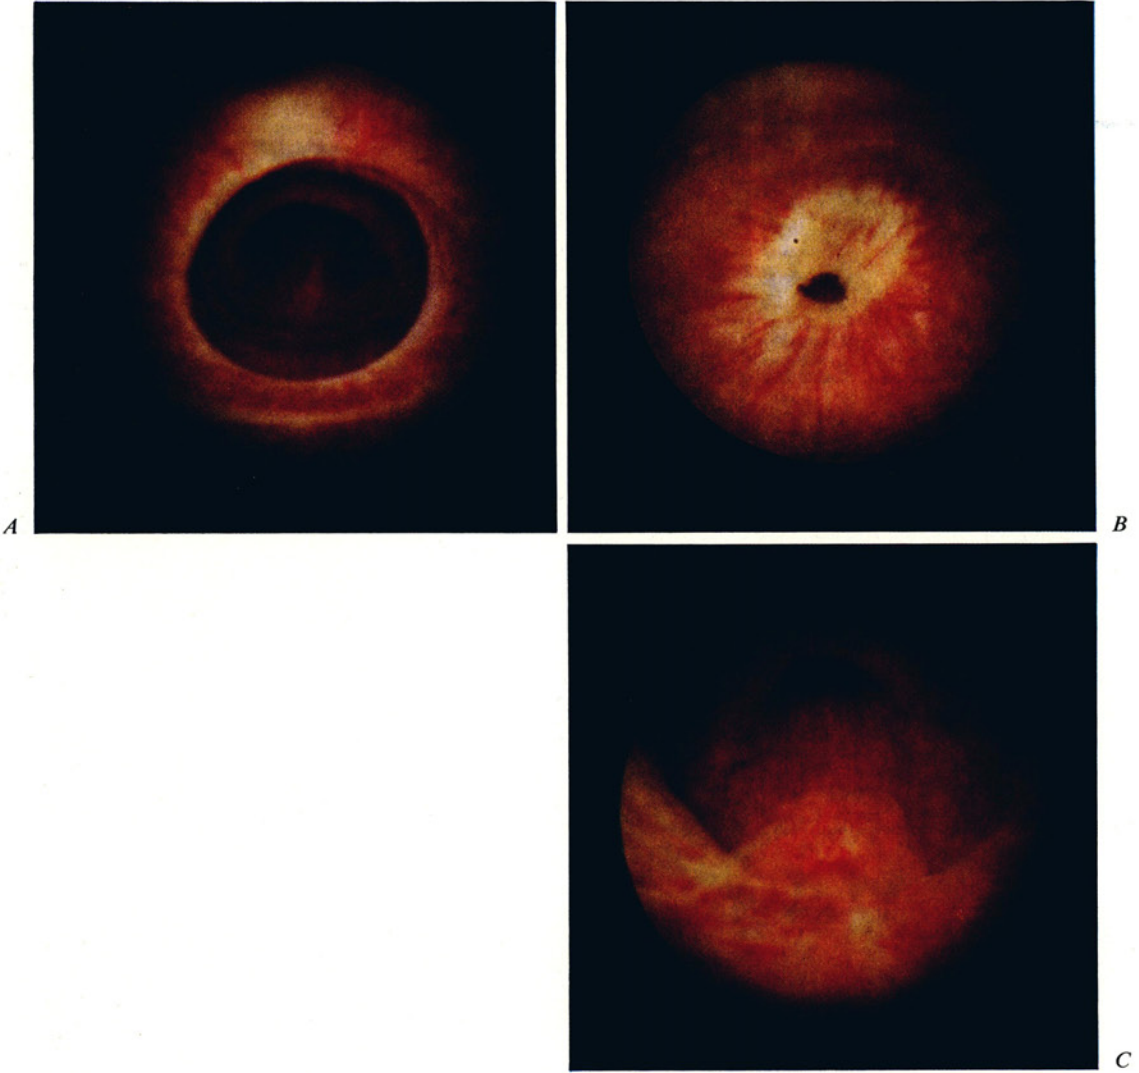

Downloaded from <http://karger.com/uin/article-pdf/30/6/1/3582230/000280019.pdf> by guest on 05 August 2025
